# Supplementary material for: How to get your message through? Designing an Impactful Knowledge transfer plan in a European Project
Source: Copernicus journal article supplement (doi:10.5194/gc-2021-29), 2021-09-21
Supplement: Supplementary file [file gc-2021-29-AC2-supplement.pdf]

# APPLICATE's Organization

## **WP1 WEATHER AND CLIMATE MODEL EVALUATION**

14 contributing institutions  
28 team members

## **WP2 ENHANCED WEATHER AND CLIMATE MODELS**

8 contributing institutions  
32 team members

## **WP3 ATMOSPHERIC AND OCEANIC LINKAGES**

11 contributing institutions  
30 team members

## **WP4 SUPPORT FOR ARCTIC OBSERVING SYSTEM DESIGN**

8 contributing institutions  
17 team members

## **WP5 IMPROVED PREDICTIVE CAPACITY**

7 contributing institutions  
25 team members

## **WP6 DATA AND HPC MANAGEMENT**

3 contributing institutions  
11 team members

## **WP7 USER ENGAGEMENT DISSEMINATION, TRAINING**

4 contributing institutions  
9 team members

## **WP8 CLUSTERING**

2 contributing institutions  
17 team members

## **WP9 PROJECT COORDINATION AND MANAGEMENT**

1 contributing institution  
5 team members
